# Supplementary material
Source: PubMed Central journal article supplement (PMC1865677)
Supplement: iai_75_4_1904__1.pdf [file iai_75_4_1904__1.pdf]

# 1 Supplemental Material: A mathematical model of phago- 2 cytosis of *C. neoformans*

3 The major findings in this system that are consistently observed in experiments and reported  
4 in ([2, 13, 15]) are an increase in the phagocytic index with the increasing concentrations of  
5 free antibody and the *prozone-like* effect, which is a paradoxical decrease in the phagocytic  
6 index at higher antibody concentrations.

7 We assume that phagocytosis is a result of attachment of microbes to macrophages and  
8 subsequent ingestion and that both processes are facilitated by the antibody bound to the  
9 microbe capsule and, possibly, to Fc receptors on macrophages. Therefore, the processes  
10 involved in phagocytosis are *binding*, of free antibody to microbes, as well as binding of  
11 free antibody to Fc receptors on macrophages. *Attachment* is a process in which antibody-  
12 coated microbes attach to macrophages. *Ingestion* is a process in which microbes attached  
13 to macrophages are internalized. In general, we assume that microbes are attached to  
14 macrophages and subsequently internalized through mechanisms that involve binding of the  
15 antibody already bound to microbes to available Fc receptors on macrophages. This assump-  
16 tion is validated by the fact that in the absence of IgG1 opsonin, there is essentially zero  
17 attachment or ingestion. It is possible that the antibody bound to Fc receptors contributes  
18 to the attachment of microbes to macrophages through binding to available sites on the *C.*  
19 *neoformans* capsule. We expect that the contribution of the second type of the binding will

1 be very small due to the rigidity of the binding sites on the capsule as opposed to flexibility  
2 of the Fc receptors on the macrophage surface, but we did not rule out this possibility *a*  
3 *priori* since the experimental results indicated an increase in the phagocytic index at concen-  
4 trations of free antibody high enough for most of Fc receptors to be occupied by antibody  
5 within minutes. Microbes can also attach to macrophages through complement receptors.  
6 In our phagocytosis system there is no phagocytosis mediated by complement component 3  
7 (C3). However, antibody binding to the capsule is believed to produce a structural change  
8 that allows direct interactions of capsular polysaccharide with the C3 receptor [14]. Hence,  
9 attachment of antibody-opsionized cells to macrophages occurs through both Fc receptors  
10 interacting with microbe-bound IgG1, and CR3 receptors interacting with a polysaccharide  
11 structural motif. According to the published data, [1], it takes on the average 15 minutes for  
12 an attached microbe to be ingested. Here we investigate how the probability that a microbe  
13 will be attached to and eventually ingested by a macrophage depends on the amount of  
14 antibody present and/or bound to both macrophages and microbes.

15 We modeled the total amount of ingested microbes as a function of the antibody bound  
16 to the microbe capsule. The dependence of the rate of ingestion on the amount of antibody  
17 and percentage of attached microbes that are ingested have not been investigated to date  
18 and it is one of the possible future directions in which our model can be refined (see below).

19 We propose a mathematical description of phagocytosis based on differential equation *E-1*  
20 which describes the rate of change of the total number of ingested microbes  $P_I$ ,  $\frac{dP_I}{dt} = r_T P_F$ .

1 We assume that the rate at which the microbes are ingested is proportional to the population  
 2 of non-ingested (free) microbes  $P_F$  and introduce a function  $r_T$ , which is the relative ( $\frac{1}{P_F} \frac{dP_I}{dt}$ )  
 3 rate of phagocytosis as a function of antibody bound to *C. neoformans* capsule and the  
 4 number of receptors available. We call the function  $r_T$  the *efficacy of phagocytosis*.

5 Phagocytosis decreases the number of free microbes and the rate of change of the popu-  
 6 lation of free microbes  $P_F$  is:

$$\frac{dP_F}{dt} = -\frac{dP_I}{dt} + \mu_P P_F \quad (E-15)$$

7

8 The term  $\mu_P P_F$  represents the growth rate of the population of unbound microbes. For  
 9 the purpose of this study we neglected the growth of the population of microbes during the  
 10 observed time of phagocytosis. We assumed that most microbes do not replicate while being  
 11 phagocytized since the phagocytosis is much faster than the doubling time of *C. neoformans*.  
 12 Furthermore, we assumed no intracellular growth since intracellular yeast replication occurs  
 13 several hours after ingestion [17], while the experiments modeled here were limited to 2 h.  
 14 Therefore we have that  $P_F = P_0 - P_I$ . The variables and parameters in our mathematical  
 15 model are listed in Tables 1, 2 and 3.

16 Motivated by the experimental results that indicate that the efficacy of phagocytosis is  
 17 a function of antibody bound to the *C. neoformans* capsule, we first studied binding of free  
 18 antibody to the microbe capsule. Binding of free antibody to microbes and macrophages is

1 described by the following three differential equations

$$\frac{dA_P}{dt} = k_{FP}(L_P - A_P)c_F - D_{FP}A_P \quad (E-16)$$

$$\frac{dA_M}{dt} = k_{FM}c_F X - D_{FM}A_M \quad (E-17)$$

$$\frac{dc_F}{dt} = -\frac{1}{N_A V} \left( \frac{dA_P}{dt} + \frac{dA_M}{dt} \right) \quad (E-18)$$

2

3 The variables and parameters that characterize the antibody binding processes we modeled  
4 are listed and described in Tables 2 and 3.

5 The differential equation *E-16* describes the change in the total amount  $A_P$  of the anti-  
6 body bound to microbes. The first term describes the binding of free antibody to microbes,  
7 and the second term antibody dissociation.  $c_F$  is the concentration of free antibody (in  
8 mol/L) and  $L_P$  is the total capacity of microbes for binding the antibody, that is the num-  
9 ber of antibody binding sites on the *Cryptococcus neoformans* capsule.

10 We adopted a general convention that the *on* rate constants are denoted by the letter  
11  $k$  with two subscripts, say  $k_{XY}$ , where the subscripts indicate the reaction in question.  
12 Similarly, *off* rate constants are denoted by the letter  $D$  with two subscripts, say  $D_{XY}$ , where

1 the subscripts again indicate the reaction in question. Therefore  $k_{FP}$  stands for the forward  
2 rate constant in the binding process of free antibody to microbes and  $k_{FM}$  for the forward  
3 rate constant constant in the binding process of free antibody to macrophages.  $D_{FP}$  and  
4  $D_{FM}$  are the corresponding dissociation rate constants and  $k_{FP} = K_P D_{FP}$ ,  $k_{FM} = K_M D_{FM}$ .

5 The differential equation *E-17* describes the binding of free antibody to macrophages;  
6  $c_F$  is the concentration of free antibody and  $X$  is the number of available Fc receptors on  
7 macrophages. The first term on the right hand side is the rate of the forward reaction, while  
8 the second term is again a dissociation term.

9 We are aware that there are at least three types of Fc-gamma receptors that could  
10 interact with IgG1 [1]. At this time there is not sufficient data on their relative prevalence  
11 and binding affinities for murine IgG1 to model them individually. Hence, we use the term  
12 Fc receptor to denote all the receptor types that can interact with IgG1 through its constant  
13 region.

14 The differential equation *E-18* describes the decrease in the concentration of free antibody  
15 through binding of free antibody to microbes and to Fc receptors on macrophages.  $N_A$  is  
16 Avogadro's number and  $V$  is the volume of a well (0.2 ml).

17 The range of antibody concentrations used in the experiments modeled here is well above  
18 the binding capacity of both macrophages and microbes (see *Results*). Therefore, in our  
19 preliminary analysis of the binding dynamics and discussion of the experimental setup we  
20 assumed that the concentration of the free antibody was constant, substituting  $c_F = c_0$

1 in the remaining equations of our model, where  $c_0$  is the initial concentration of the free  
2 antibody. This assumption enabled us to solve the differential equation *E-16* analytically.  
3 We also neglected the possible reduction in available binding sites on *C. neoformans* due  
4 the attached macrophages. The solution is the exponential function given by equation *E-12*.  
5 Equation *E-11* was obtained in the similar way from equation *E-17*. In addition to considered  
6  $A_F$  to be a constant, when deriving *E-11* we also assumed that the number of available Fc  
7 receptors  $X$  is  $L_M - A_M$  (see discussion below).

8 The last two equations in our model describe the rate of change of Fc and complement  
9 receptors. Published results [7] imply that Fc receptors ingested during phagocytosis of live  
10 cells are degraded. The expression of the Fc receptors in such conditions is not restored to  
11 the level prior to phagocytosis for hours. Therefore we can consider that the Fc receptors  
12 initially present are effectively removed from the cell after phagocytosis and for the duration  
13 of our experiments. It is possible that some Fc receptors are replenished during the course of  
14 our experiments, since Fc receptor activation triggers synthesis of Fc receptors [12]. However,  
15 since the published data are contradictory on this point, we did not include synthesis of new  
16 Fc receptors in our model.

17 Given that one macrophage can ingest numerous yeast cells, the number of microbes used  
18 in our experiments is considerably smaller than the phagocytic capacity of the macrophages  
19 involved. Hence, for the purposes of this study we neglected the possible influence of the  
20 decrease in the number of available receptors, both Fc and complement, due to their removal

1 through phagocytosis on the efficacy of phagocytosis.

2 We also assumed that the population of macrophages is constant, neglecting the rather  
3 small growth rate: the doubling rate of normal J774 cells is approximately 12 hours [6].

4 Binding of free antibody reduces the number of available Fc receptors for binding of  
5 microbe-associated antibody. Differential equation *E-19* describes the decrease in the number  
6 of available Fc receptors  $X$  due to binding of free antibody

$$\frac{dX}{dt} = -k_{FM}XA_F + D_{FM}A_M. \quad (E-19)$$

7

8

9 We assume that the number of complement receptors does not change significantly due  
10 to phagocytosis, therefore  $Z$  is constant in our model.
